# Supplementary material
Source: ML conference proceedings conference paper supplement (https://aclanthology.org/D18-1365)
Supplement: Attachment [file supplementary_material_paper1533.pdf › supplementary_material_paper1533.pdf]

# Supplementary Material "Explaining Character-Aware Neural Networks for Word-Level Prediction: Do They Discover Linguistic Rules?"

Frédéric Godin, Kris Demuynck, Joni Dambre, Wesley De Neve and Thomas Demeester

IDLab, Ghent University - imec, Ghent, Belgium

firstname.lastname@ugent.be

## 1 Introduction

This document contains supplementary material for the paper "*Explaining character-aware neural networks for word-level prediction: Do they discover linguistic rules?*". It consists of some additional information on dataset selection, used morphological classes, per class individual training results and the full statistical analysis associated with Section 5.4 in the paper.

## 2 Notes on Dataset Selection

In the paper (Silfverberg and Hulden, 2017) that introduced the morphological segmentations for a subset of the Universal Dependencies dataset 1.4, sentences from the training dataset were selected for constructing the test set. Although the paper mentions that all test set sentences for Finnish, Spanish and Swedish were selected from the Universal Dependencies test sets, this is not the case for Finnish. The first 515 lines of *fi-ud-train.conllu* were used for selecting 300 test set words. Given that a new sentence starts at line 521, we removed the first 520 lines from the Finnish training set. This is only 0.3% of the full training set, and consequently, this will have a negligible impact on our conclusions. Note that, for Spanish and Swedish, the segmented words were indeed selected from their respective test sets. The above observations were also confirmed by the first author of the original paper.

## 3 Overview Morphological Classes Used

In Table 1, Table 2 and Table 3, all class types and corresponding feature class values for Finnish, Spanish and Swedish are listed. During training, each class type has a specific multinomial regression layer which predicts a single value for that class type. However, all class types are jointly trained.

## 4 Individual Results Morphological Tagging

In Table 4, Table 5 and Table 6, the individual results for each morphological feature class for Finnish, Spanish and Swedish can be found.

## 5 Full statistical analysis for "Interactions of learned patterns"

From the full UD test set, we selected all words that end with the character *a* and evaluated the morphological feature type gender for all of them. We selected three groups:

- Words that have the label `gender=feminine` and are classified as `gender=feminine`, called `wf_pf`. This group contains 219 words.
- Words that do not have the label `gender=feminine` are classified as `gender=feminine`, `wnf_pf`. This group contains 44 words.
- Words that do not have the label `gender=feminine` are classified as either `gender=NA` or `gender=masc`, i.e. not-feminine, called `wnf_pnf`. This group contains 199 words.

For each group, we calculated the contributions of all possible character sets of different length within each word and selected the highest contribution score and the lowest contribution score for each word. In other words, we look for the sets of characters that generate the strongest positive and negative contributions for predicting the class `gender=feminine`. These two contribution scores are the determining factors for certain classification decisions.

## 5.1 Maximum contribution scores

Based on a Kruskal-Wallis test, a statistically significant difference was found between the three groups,  $H(2) = 50,600$ ,  $p < 0.001$ . Pairwise comparisons with adjusted p-values showed no significant difference in positive contributions scores between the groups wnf\_pf and wnf\_pnf ( $p = 1.000$ ). Hence, non-feminine words have similar positive contribution scores, independent of the classification result. Furthermore, significant differences were found between the positive contribution scores of the groups wf\_pf and wnf\_pf ( $p < 0.001$ ) and the groups wf\_pf and wnf\_pnf ( $p < 0.001$ ), indicating a difference between the positive contributions of feminine words and non-feminine words.

## 5.2 Minimum contribution scores

Based on a Kruskal-Wallis test, an overall statistically significant difference was found between the three groups,  $H(2) = 36.710$ ,  $p < 0.001$ . Pairwise comparisons with adjusted p-values showed that there was no significant difference between the groups wf\_pf and wnf\_pf ( $p = 0.585$ ), showing that the negative contribution scores of words classified as feminine are similar despite that the fact that the words from wnf\_pf are not feminine. A strong significant difference was found between the groups wf\_pf and wnf\_pnf ( $p < 0.001$ ) and a borderline significant difference between the groups wnf\_pnf and wnf\_pf ( $p < 0.070$ ). Consequently, there is a clear difference between the negative contributions of non-feminine words that are classified as not-feminine and words that are classified as feminine. Moreover, words that are wrongly classified as feminine have similar negative contribution scores as words classified correctly as feminine.

## References

Miikka Silfverberg and Mans Hulden. 2017. Automatic morpheme segmentation and labeling in universal dependencies resources. In *Proceedings of the NoDaLiDa 2017 Workshop on Universal Dependencies (UDW 2017)*.

Table 1: Overview of classes used for Finnish.

| Class type   | Values                                                                 |
|--------------|------------------------------------------------------------------------|
| Number       | _NA_ Sing Plur                                                         |
| PartForm     | _NA_ Past Pres Agt Neg                                                 |
| Case         | _NA_ Ela Ine Ins Par Ill Com<br>Nom All Acc Ade Gen Ess Abl<br>Tra Abe |
| Person       | _NA_ 1 2 3                                                             |
| Derivation   | _NA_ Ja Minen Sti Vs Tar Llinen<br>Inen U Ttaa Ttain Lainen Ton        |
| Person[psor] | _NA_ 1 2 3                                                             |
| VerbForm     | _NA_ Inf Part Fin                                                      |
| Mood         | _NA_ Imp Cnd Pot Ind                                                   |
| Tense        | _NA_ Past Pres                                                         |
| Clitic       | _NA_ Pa,S Han Ko Pa Han,Pa<br>Han,Ko Ko,S S Kin Kaan Ka                |
| Degree       | _NA_ Pos Cmp Sup                                                       |
| Voice        | _NA_ Pass Act                                                          |

Table 2: Overview of classes used for Spanish.

| Class type | Values                 |
|------------|------------------------|
| Person     | _NA_ 1 2 3             |
| Mood       | _NA_ Imp Ind Sub Cnd   |
| Tense      | _NA_ Fut Imp Pres Past |
| Gender     | _NA_ Fem Masc          |
| VerbForm   | _NA_ Inf Ger Part Fin  |
| Number     | _NA_ Sing Plur         |

Table 3: Overview of classes used for Swedish.

| Class type | Values                     |
|------------|----------------------------|
| Gender     | _NA_ Neut Masc Fem Com     |
| Degree     | _NA_ Sup Cmp Pos           |
| Number     | _NA_ Sing Plur             |
| Case       | _NA_ Gen Nom Acc           |
| Poss       | _NA_ Yes                   |
| Voice      | _NA_ Act Pass              |
| Tense      | _NA_ Pres Past             |
| Definite   | _NA_ Ind Def               |
| VerbForm   | _NA_ Sup Part Inf Fin Stem |

Table 4: Per class accuracy on the Finnish test set.

|           | Number | Partform | Case   | Person | Derivation | Person[psor] |
|-----------|--------|----------|--------|--------|------------|--------------|
| Maj. Vote | 64.42% | 94.33%   | 28.49% | 89.17% | 98.43%     | 96.05%       |
| CNN       | 89.40% | 96.97%   | 87.00% | 95.81% | 99.07%     | 98.49%       |
| BiLSTM    | 89.67% | 97.86%   | 87.89% | 95.77% | 99.11%     | 99.29%       |

|           | Verbform | Mood   | Tense  | Clitic | Degree | Voice  |
|-----------|----------|--------|--------|--------|--------|--------|
| Maj. Vote | 77.54%   | 87.77% | 89.09% | 98.49% | 84.16% | 78.49% |
| CNN       | 93.05%   | 95.90% | 96.17% | 99.51% | 92.70% | 93.59% |
| BiLSTM    | 93.19%   | 96.13% | 95.99% | 99.51% | 92.97% | 94.12% |

Table 5: Per class accuracy on the Spanish test set.

|           | Person | Mood   | Tense  | Gender | Verbform | Number |
|-----------|--------|--------|--------|--------|----------|--------|
| Maj. Vote | 85.26% | 87.62% | 85.99% | 54.40% | 75.49%   | 45.56% |
| CNN       | 91.84% | 93.51% | 91.11% | 84.62% | 88.08%   | 84.41% |
| BiLSTM    | 91.95% | 93.41% | 90.90% | 84.31% | 89.02%   | 86.40% |

Table 6: Per class accuracy on the Swedish test set.

|           | Gender | Degree | Number | Case   | Poss   | Voice  | Tense  | Definite | Verbform |
|-----------|--------|--------|--------|--------|--------|--------|--------|----------|----------|
| Maj. Vote | 46.64% | 84.57% | 42.21% | 62.73% | 99.67% | 83.99% | 87.57% | 41.54%   | 79.19%   |
| CNN       | 86.18% | 93.78% | 79.45% | 87.79% | 99.94% | 94.60% | 94.29% | 83.83%   | 90.98%   |
| BiLSTM    | 83.97% | 94.26% | 78.72% | 86.04% | 99.97% | 93.75% | 93.84% | 83.86%   | 90.64%   |
